# Supplementary material for: Preparation of mesoporous ZnAl2O4 nanoflakes by ion exchange from a Na-dawsonite parent material in the presence of an ionic liquid
Source: Royal Society of Chemistry journal article supplement (doi:10.1039/c8ra10524c), 2019-01-01
Supplement: c8ra10524c1.pdf [file c8ra10524c1.pdf]

## Supporting Information

# Preparation of Mesoporous ZnAl<sub>2</sub>O<sub>4</sub> Nanoflakes by Ion Exchange from Na-Dawsonite Parent in the Presence of Ionic Liquid

TongIl Kim<sup>a,b</sup>, HakSung Yun<sup>a</sup>, GwangBok Han<sup>a</sup>, Jiabiao Lian<sup>b,c</sup>, Jianmin Ma<sup>b,d</sup>,  
Xiaochuan Duan<sup>b,e</sup>, Lianjie Zhu<sup>\*f</sup> and Wenjun Zheng<sup>\*b</sup>

<sup>a</sup> Institute of Chemistry and Biology, University of Science, Unjong District,  
Pyongyang, D. P. R. Korea

<sup>b</sup> Department of Materials Chemistry, Key Laboratory of Advanced Energy Materials  
Chemistry and TKL of Metal and Molecule-Based Material Chemistry, Collage of  
Chemistry, Nankai University Tianjin, 300071, P. R. China

<sup>c</sup> Institute for Energy Research, Jiangsu University, Zhenjiang 212013, P. R. China

<sup>d</sup> School of Physics and Electronics, Hunan University, Changsha 410082, P. R. China

<sup>e</sup> Pen-Tung Sah Institute of Micro-Nano Science and Technology of Xiamen  
University, Xiamen, 361005, P. R. China

<sup>f</sup> School of Chemistry & Chemical Engineering, Tianjin University of Technology,  
Tianjin 300384, P. R. China

\* Corresponding Authors: Wenjun Zheng, E-mail: [zhwj@nankai.edu.cn](mailto:zhwj@nankai.edu.cn) (W. Zheng); Lianjie Zhu,  
E-mail: [zhulj@tjut.edu.cn](mailto:zhulj@tjut.edu.cn) (L. Zhu).

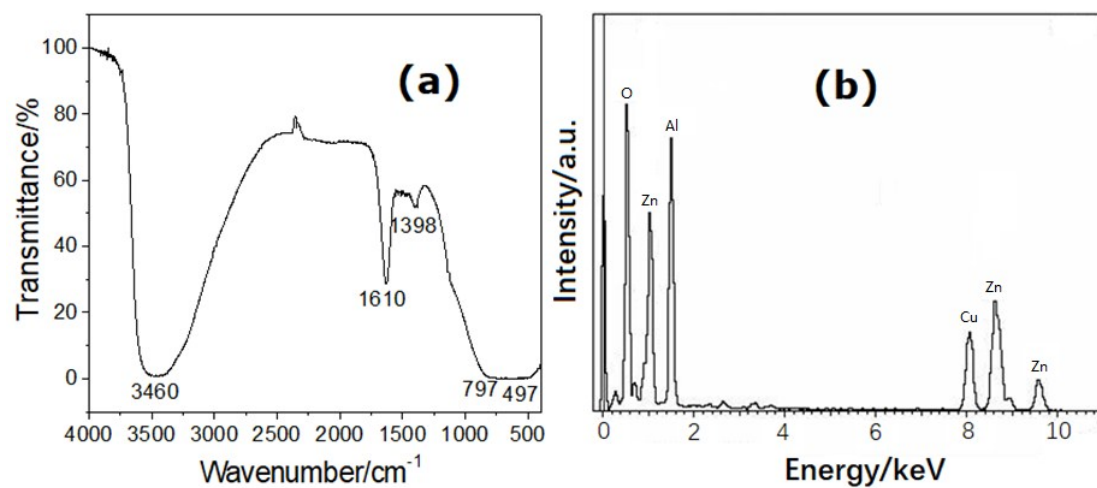

**Figure S1.** (a) FTIR and (b) EDX spectra of the  $\text{ZnAl}_2\text{O}_4$  product obtained after calcined at 700 °C.

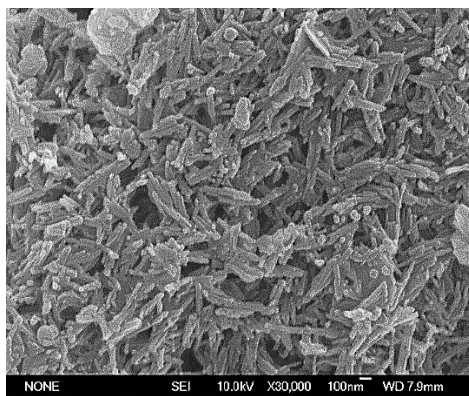

**Figure S2.** FE-SEM image of the Na-Dw product prepared by hydrothermal method at 120 °C for 12 h.

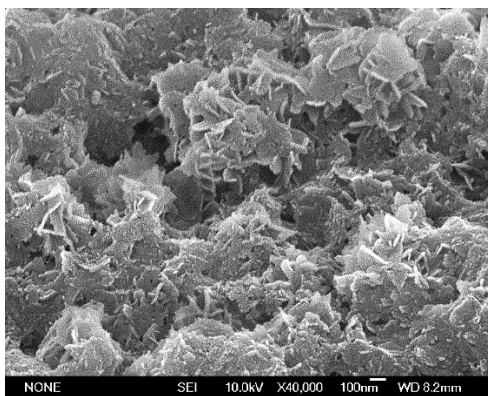

**Figure S3.** FE-SEM image of the product obtained by ion exchange from the Na-Dw in the absence of ILs at 50 °C for 10 h.

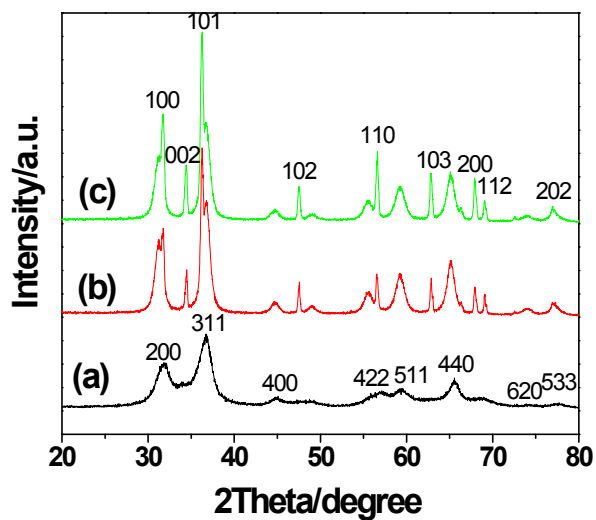

**Figure S4.** XRD patterns of the samples obtained by calcining the precursors at 700 °C for 2 h. The precursors were prepared by using different mole ratios of Zn<sup>2+</sup>:NaDw: (a) 1:2, (b) 1:1 and (c) 2:1.

When the mole ratio is 1:2, pure ZnAl<sub>2</sub>O<sub>4</sub> crystals can be obtained. When it is 2:1, however, ZnO phase becomes the main crystal phase of the product.

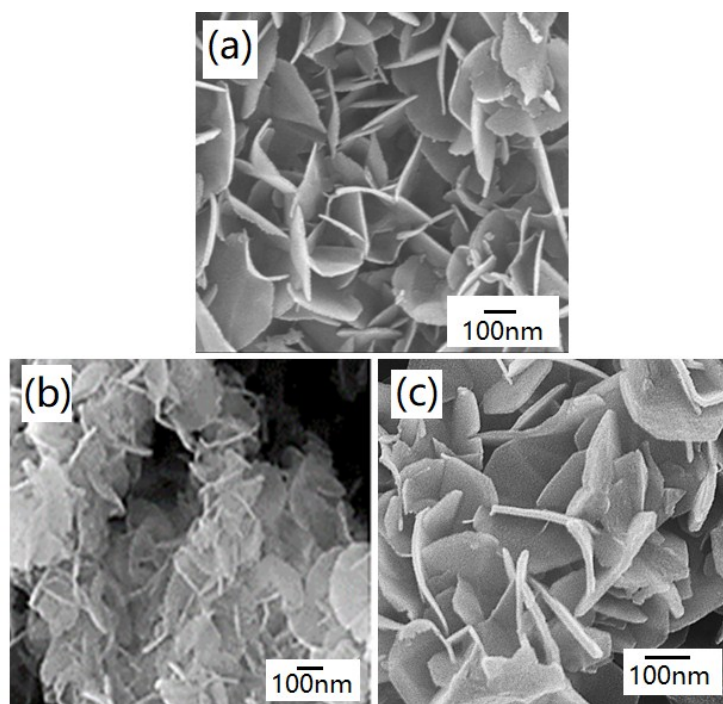

**Figure S5.** FE-SEM images of the samples obtained using different mole ratios of  $\text{Zn}^{2+}$ :Na-Dw: (a) 1:2, (b) 1:1 and (c) 2:1.

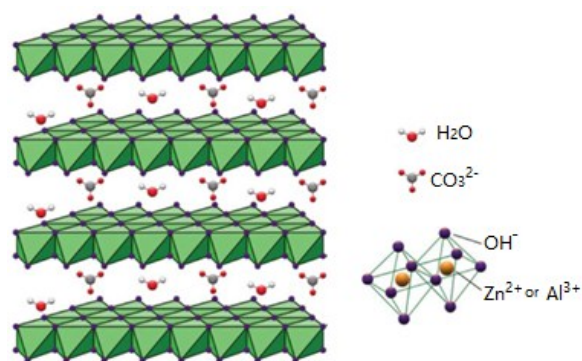

**Scheme S1.** Schematic diagram of hydrotalcite-like  $\text{Zn}_6\text{Al}_2(\text{OH})_{16}(\text{CO}_3)\cdot 4\text{H}_2\text{O}$  crystal structure<sup>✳</sup>.

✳ Pedro Ivo R. Moraes, Sergio R. Tavares, Viviane S. Vaiss, and Alexandre A. Leitao. Ab Initio Study of Layered Double Hydroxides Containing Iron and Its Potential Use as Fertilizer *J. Phys. Chem. C* 2016, **120**, 9965-9974.
